# Supplementary material for: Phylogenetic diversity meets conservation policy: small areas are key to preserving eucalypt lineages
Source: PubMed Central journal article supplement (PMC4290421; doi:10.1098/rstb.2014.0007), 2015-02-19

Pollock, L.J. *et al.* 2015 Phylogenetic diversity meets conservation policy: small areas are key to preserving eucalypt lineages. *Phil. Trans. R. Soc. B* **370** doi: 10.1098/rstb.2014.0007

## **Supplementary materials**

### **Appendix S1: Eucalypt species list**

The species, type of distribution, prevalence- the total probability of occurrence of each species across all cells in the landscape ('Sum Occur.'), cross-validated Area Under the ROC Curve (AUC) statistic, common name, molecular sample ID and naming authority. The distribution of a species was delineated in ArcMap or modelled using Boosted Regression Trees (BRTs) or MaxEnt (with or without a mask bounding the distribution). Cross-validated AUC values are from the 10% of data withheld from the model for each of 10 replicates (final models were fit with all data) for BRT models and MaxEnt models (in brackets). Five species were missing molecular sequence information. The five missing species were placed in the phylogeny in the clade of the closely related species with a branch length of zero.

Eucalypts are a challenging taxonomic group, and a variety of sources were used to make decisions regarding species names and distributions including EUCLID version 3, Nicolle (2006) and expert opinion. This list does not include subspecies and some recently described species in Victoria including *Eucalyptus macmahonii*, *molyneuxii*, *Eucalyptus silvestris* (included with *E. microcarpa*), *Eucalyptus wimmerensis* (included as *E. viridis*).

| <b>Species</b>                  | <b>Distribution Type</b> | <b>cvAUC</b>                     | <b>Sum Occur.</b> | <b>Common Name</b>    | <b>Sample ID</b> | <b>Authority</b>                           |
|---------------------------------|--------------------------|----------------------------------|-------------------|-----------------------|------------------|--------------------------------------------|
| <i>Angophora floribunda</i>     | MaxEnt-Mask              | (1.000 ± 0.000)                  | 669               | Apple                 | LAN107           | (Sm.) Sweet                                |
| <i>Corymbia gummifera</i>       | MaxEnt-Mask              | (0.999 ± 0.001)                  | 815               | Red bloodwood         | 680              | (Sol. ex Gaertn.) K.D.Hill & L.A.S.Johnson |
| <i>Corymbia maculata</i>        | MaxEnt-Mask              | (0.999 ± 0.001)                  | 777               | Spotted gum           | ANBG7800470      | (Hook.) K.D.Hill & L.A.S.Johnson           |
| <i>Eucalyptus agglomerata</i>   | BRTs                     | 0.985 ± 0.011                    | 2334              | Blue-leaf Stringybark | 673              | Maiden                                     |
| <i>Eucalyptus aggregata</i>     | MaxEnt-Mask              | (0.999 ± 0.001)                  | 609               | Black Gum             | 580              | H. Deane & Maiden                          |
| <i>Eucalyptus alaticaulis</i>   | BRTs                     | 0.991 ± 0.011                    | 6312              | Grampians Grey-gum    | 371              | R.J. Watson & Ladiges                      |
| <i>Eucalyptus albens</i>        | BRTs                     | 0.991 ± 0.006                    | 40996             | White Box             | 661              | Benth.                                     |
| <i>Eucalyptus alligatrix</i>    | MaxEnt                   | 0.991 ± 0.012<br>(0.994 ± 0.003) | 12164             | Silver Stringybark    | 167              | L.A.S. Johnson & K.D. Hill                 |
| <i>Eucalyptus angophoroides</i> | BRTs                     | 0.981 ± 0.030                    | 2277              | Apple Box             | 158              | R.T. Baker                                 |
| <i>Eucalyptus arenacea</i>      | BRTs                     | 0.978 ± 0.043                    | 28817             | Desert Stringybark    | MC10652          | Marginson & Ladiges                        |
| <i>Eucalyptus aromaphloia</i>   | BRTs                     | 0.962 ± 0.031                    | 35849             | Scentbark             | CANB564611       | L.D. Pryor & J.H. Willis                   |
| <i>Eucalyptus baueriana</i>     | BRTs                     | 0.976 ± 0.044                    | 7648              | Blue Box              | 160              | Schauer                                    |
| <i>Eucalyptus baxteri</i>       | BRTs                     | 0.944 ± 0.009                    | 121553            | Brown Stringybark     | 8701806          | (Benth.) Maiden & Blakely ex J.M. Black    |
| <i>Eucalyptus behriana</i>      | BRTs                     | 0.984 ± 0.007                    | 100531            | Bull Mallee           | (populnea)       | F. Muell.                                  |
| <i>Eucalyptus blakelyi</i>      | BRTs                     | 0.992 ± 0.008                    | 65632             | Blakely's Red-gum     | 211              | Maiden                                     |
| <i>Eucalyptus bosistoana</i>    | BRTs                     | 0.982 ± 0.018                    | 5329              | Coast Grey-box        | 671              | F. Muell.                                  |
| <i>Eucalyptus botryoides</i>    | BRTs                     | 0.968 ± 0.015                    | 35070             | Southern Mahogany     | 304              | Sm.                                        |
| <i>Eucalyptus bridgesiana</i>   | BRTs                     | 0.942 ± 0.012                    | 51892             | But But               | 257              | R.T. Baker                                 |
| <i>Eucalyptus brookeriana</i>   | MaxEnt                   | 0.903 ± 0.154<br>(0.983 ± 0.007) | 15753             | Brooker's Gum         | 617              | A.M. Gray                                  |
| <i>Eucalyptus cadens</i>        | MaxEnt-Mask              | (0.999 ± 0.001)                  | 899               | Warby Range Swamp-gum | 617              | J.D. Briggs & Crisp                        |
| <i>Eucalyptus calycogona</i>    | BRTs                     | 0.988 ± 0.004                    | 98412             | Red Mallee            | 362              | Turcz.                                     |

|                                   |             |                                  |        |                          |                    |                                |
|-----------------------------------|-------------|----------------------------------|--------|--------------------------|--------------------|--------------------------------|
| <i>Eucalyptus camaldulensis</i>   | BRTs        | 0.984 ± 0.002                    | 637495 | River Red-gum            | ANBG8401853        | Dehnh.                         |
| <i>Eucalyptus camphora</i>        | BRTs        | 0.968 ± 0.017                    | 40476  | Mountain Swamp-gum       | 621                | L.A.S. Johnson & K.D. Hill     |
| <i>Eucalyptus cephalocarpa</i>    | BRTs        | 0.956 ± 0.008                    | 20416  | Mealy Stringybark        | 178                | Blakely                        |
| <i>Eucalyptus chapmaniana</i>     | BRTs        | 0.966 ± 0.053                    | 12476  | Bogong Gum               | (rubidaANBG732895) | Cameron                        |
| <i>Eucalyptus cinerea</i>         | MaxEnt-Mask | (1.000 ± 0.000)                  | 591    | Mealy stringybark        | 8703938            | F.Muell. ex Benth.             |
| <i>Eucalyptus considiniana</i>    | BRTs        | 0.961 ± 0.011                    | 45139  | Yertchuk                 | 219                | Maiden                         |
| <i>Eucalyptus conspicua</i>       | BRTs        | 0.944 ± 0.094                    | 2077   | Silver Swamp Stringybark | 113                | L.A.S. Johnson & K.D. Hill     |
| <i>Eucalyptus costata</i>         | BRTs        | 0.992 ± 0.002                    | 211175 | Yellow Mallee            | 283                | F. Muell. & Behr ex. F. Muell. |
| <i>Eucalyptus crenulata</i>       | MaxEnt      | (0.999 ± 0.000)                  | 18218  | Buxton Gum               | 307                | Blakely & Beuzev.              |
| <i>Eucalyptus croajingolensis</i> | BRTs        | 0.950 ± 0.008                    | 22527  | Gippsland Peppermint     | 156                | L.A.S. Johnson & K.D. Hill     |
| <i>Eucalyptus cyanophylla</i>     | MaxEnt      | 0.998 ± 0.002<br>(0.999 ± 0.000) | 14808  | Blue-leaf Mallee         | 338                | Brooker                        |
| <i>Eucalyptus cypellocarpa</i>    | BRTs        | 0.923 ± 0.005                    | 209873 | Mountain Grey-gum        | 665                | L.A.S. Johnson                 |
| <i>Eucalyptus dalrympleana</i>    | BRTs        | 0.985 ± 0.004                    | 38210  | Mountain Gum             | ANBG7804378        | Maiden                         |
| <i>Eucalyptus delegatensis</i>    | BRTs        | 0.991 ± 0.002                    | 74188  | Alpine Ash               | CANB499445         | R.T. Baker                     |
| <i>Eucalyptus denticulata</i>     | BRTs        | 0.992 ± 0.006                    | 6948   | Errinundra Shining Gum   | 378                | I.O. Cook & Ladiges            |
| <i>Eucalyptus diversifolia</i>    | MaxEnt-Mask | (1.000 ± 0.000)                  | 302    | Coast Gum                | 390                | I.J. Wright & Ladiges          |
| <i>Eucalyptus dives</i>           | BRTs        | 0.941 ± 0.010                    | 232441 | Broad-leaf Peppermint    | ANBG7809979        | Schauer                        |
| <i>Eucalyptus dumosa</i>          | BRTs        | 0.987 ± 0.002                    | 391068 | Dumosa Mallee            | 329                | A. Cunn. ex J. Oxley           |
| <i>Eucalyptus dwyeri</i>          | MaxEnt-Mask | (0.998 ± 0.000)                  | 329    | Dwyer's red gum          | 9406593            | Maiden & Blakely               |
| <i>Eucalyptus elaeophloia</i>     | MaxEnt      | (1.000 ± 0.000)                  | 1706   | Olive Mallee             | 372                | Chappill, Crisp & Prober       |
| <i>Eucalyptus elata</i>           | BRTs        | 0.961 ± 0.006                    | 20083  | River Peppermint         | ANBG73059          | Dehnh.                         |
| <i>Eucalyptus eugenioides</i>     | Delineated  |                                  | 52     | Thin-leaved Stringybark  | 578                | Sieber ex Spreng.              |
| <i>Eucalyptus fasciculosa</i>     | MaxEnt-Mask | (1.000 ± 0.000)                  | 285    | Pink Gum                 | 289                | F. Muell.                      |
| <i>Eucalyptus fastigata</i>       | BRTs        | 0.986 ± 0.003                    | 20852  | Cut-tail                 | 8603812            | H. Deane & Maiden              |
| <i>Eucalyptus fraxinoides</i>     | MaxEnt-Mask | (0.994 ± 0.001)                  | 2266   | White Ash                | 751650             | H. Deane & Maiden              |

|                                |             |                                  |        |                       |                            |                            |
|--------------------------------|-------------|----------------------------------|--------|-----------------------|----------------------------|----------------------------|
| <i>Eucalyptus froggattii</i>   | MaxEnt      | (0.991 ± 0.004)                  | 66689  | Kamarooka Mallee      | 479                        | Blakely                    |
| <i>Eucalyptus fulgens</i>      | BRTs        | 0.964 ± 0.027                    | 5603   | Green Scentbark       | 9707943                    | Rule                       |
| <i>Eucalyptus glaucescens</i>  | BRTs        | 0.930 ± 0.134                    | 1848   | Tingaringy Gum        | 218                        | Maiden & Blakely           |
| <i>Eucalyptus globoidea</i>    | BRTs        | 0.957 ± 0.006                    | 130757 | White Stringybark     | 729                        | Blakely                    |
| <i>Eucalyptus globulus</i>     | BRTs        | 0.925 ± 0.014                    | 102151 | Southern Blue-gum     | ANBG85001816               | Labill.                    |
| <i>Eucalyptus goniocalyx</i>   | BRTs        | 0.959 ± 0.008                    | 202510 | Bundy                 | 669                        | F. Muell. ex Miq.          |
| <i>Eucalyptus gracilis</i>     | BRTs        | 0.987 ± 0.008                    | 135366 | Yorrell               | 202                        | F. Muell.                  |
| <i>Eucalyptus ignorabilis</i>  | BRTs        | 0.848 ± 0.173                    | 2558   | Grey Scentbark        | 379                        | L.A.S. Johnson & K.D. Hill |
| <i>Eucalyptus kitsoniana</i>   | MaxEnt      | 0.818 ± 0.353<br>(0.971 ± 0.021) | 57491  | Bog Gum               | 110                        | Maiden                     |
| <i>Eucalyptus kybeanensis</i>  | MaxEnt      | (0.983 ± 0.011)                  | 13622  | Mallee Ash            | AHTE19                     | Maiden & Cabbage           |
| <i>Eucalyptus largiflorens</i> | BRTs        | 0.992 ± 0.001                    | 288327 | Black Box             | CANB785604                 | F. Muell.                  |
| <i>Eucalyptus leptophylla</i>  | BRTs        | 0.989 ± 0.005                    | 205763 | Slender-leaf Mallee   | 200                        | F. Muell. ex Miq.          |
| <i>Eucalyptus leucoxydon</i>   | BRTs        | 0.973 ± 0.011                    | 258249 | Yellow Gum            | 716                        | F. Muell.                  |
| <i>Eucalyptus litoralis</i>    | BRTs        | 0.996 ± 0.009                    | 733    | Otway Grey-gum        | (cypellocarpa665)          | Rule                       |
| <i>Eucalyptus mackintii</i>    | MaxEnt      | (0.966 ± 0.019)                  | 23137  | Gippsland Stringybark | 308                        | Kottek                     |
| <i>Eucalyptus macrorhyncha</i> | BRTs        | 0.956 ± 0.004                    | 292817 | Red Stringybark       | 761                        | F. Muell. ex Benth.        |
| <i>Eucalyptus mannifera</i>    | BRTs        | 0.970 ± 0.017                    | 71139  | Brittle Gum           | 610                        | Mudie                      |
| <i>Eucalyptus melliodora</i>   | BRTs        | 0.948 ± 0.006                    | 218464 | Yellow Box            | ANBG662272                 | A. Cunn. ex Schauer        |
| <i>Eucalyptus microcarpa</i>   | BRTs        | 0.986 ± 0.004                    | 383519 | Grey Box              | 475                        | (Maiden) Maiden            |
| <i>Eucalyptus mitchelliana</i> | MaxEnt-Mask | (1.000 ± 0.000)                  | 74     | Buffalo Sallee        | 635                        | Cabbage                    |
| <i>Eucalyptus muelleriana</i>  | BRTs        | 0.958 ± 0.010                    | 48398  | Yellow Stringybark    | 159                        | A.W. Howitt                |
| <i>Eucalyptus neglecta</i>     | MaxEnt      | (0.987 ± 0.006)                  | 77213  | Omeo Gum              | 72027                      | Maiden                     |
| <i>Eucalyptus nitens</i>       | BRTs        | 0.985 ± 0.011                    | 7700   | Shining Gum           | ANBG651034                 | (H. Deane & Maiden) Maiden |
| <i>Eucalyptus nortonii</i>     | BRTs        | 0.981 ± 0.024                    | 3465   | Silver Bundy          | 664                        | (Blakely) L.A.S. Johnson   |
| <i>Eucalyptus obliqua</i>      | BRTs        | 0.895 ± 0.006                    | 458305 | Messmate Stringybark  | RoyalCanberraGo<br>lfAHT21 | L'Her.                     |

|                                |             |                                  |        |                        |                  |                                          |
|--------------------------------|-------------|----------------------------------|--------|------------------------|------------------|------------------------------------------|
| <i>Eucalyptus odorata</i>      | MaxEnt      |                                  | 18763  | Peppermint Box         | (viridis767)     | Behr in D.F.L. von Schlechtendal         |
| <i>Eucalyptus oleosa</i>       | BRTs        | 0.993 ± 0.002                    | 306000 | Oil Mallee             | 58               | F. Muell. ex Miq.                        |
| <i>Eucalyptus ovata</i>        | BRTs        | 0.914 ± 0.010                    | 291629 | Swamp Gum              | ANBG475702       | Labill.                                  |
| <i>Eucalyptus pauciflora</i>   | BRTs        | 0.986 ± 0.005                    | 92261  | Snow Gum               | ANBG9303293      | Sieber ex Spreng.                        |
| <i>Eucalyptus perriniana</i>   | MaxEnt      | 0.957 ± 0.086<br>(0.988 ± 0.007) | 20150  | Spinning Gum           | 742              | F. Muell. ex Rodway                      |
| <i>Eucalyptus phenax</i>       | MaxEnt      | (0.988 ± 0.005)                  | 167325 | Green-leaf Mallee      | 375              | Brooker & Slee                           |
| <i>Eucalyptus polyanthemus</i> | BRTs        | 0.962 ± 0.006                    | 221409 | Red Box                | 659              | Schauer                                  |
| <i>Eucalyptus polybractea</i>  | BRTs        | 0.981 ± 0.048                    | 6894   | Blue Mallee            | 760              | R.T. Baker                               |
| <i>Eucalyptus porosa</i>       | MaxEnt      | 0.944 ± 0.106<br>(0.987 ± 0.004) | 194668 | Black Mallee-box       | MC10664          | F. Muell. ex Miq.                        |
| <i>Eucalyptus radiata</i>      | BRTs        | 0.901 ± 0.012                    | 369529 | Narrow-leaf Peppermint | 732              | Â Sieber ex DC.                          |
| <i>Eucalyptus regnans</i>      | BRTs        | 0.988 ± 0.003                    | 66514  | Mountain Ash           | ANBG8501815      | F. Muell.                                |
| <i>Eucalyptus rubida</i>       | BRTs        | 0.949 ± 0.007                    | 125974 | Candlebark             | ANBG732895       | H. Deane & Maiden                        |
| <i>Eucalyptus sabulosa</i>     | BRTs        | 0.975 ± 0.043                    | 11253  | Wimmera Scentbark      | CANB564611       | Rule                                     |
| <i>Eucalyptus saxatilis</i>    | MaxEnt-Mask | (0.998 ± 0.001)                  | 365    | Rock Mallee            | 7906246          | J.B. Kirkp. & Brooker                    |
| <i>Eucalyptus serraensis</i>   | MaxEnt-Mask | (0.996 ± 0.001)                  | 149    | Grampians Stringybark  | MC10646          | Ladiges & Whiffin                        |
| <i>Eucalyptus sideroxylon</i>  | BRTs        | 0.996 ± 0.008                    | 7524   | Mugga                  | 750609           | A. Cunn. ex Woolls                       |
| <i>Eucalyptus sieberi</i>      | BRTs        | 0.963 ± 0.003                    | 119720 | Silvertop Ash          | ANBG8411661      | L.A.S. Johnson                           |
| <i>Eucalyptus smithii</i>      | BRTs        | 0.955 ± 0.014                    | 11689  | Gully Gum              | 217              | R.T. Baker                               |
| <i>Eucalyptus socialis</i>     | BRTs        | 0.988 ± 0.001                    | 163111 | Grey Mallee            | 276              | F. Muell. ex Miq.                        |
| <i>Eucalyptus splendens</i>    | MaxEnt-Mask | (1.000 ± 0.000)                  | 434    | Apple Jack             | 303              | Rule                                     |
| <i>Eucalyptus stellulata</i>   | BRTs        | 0.977 ± 0.009                    | 11917  | Black Sallee           | 9102880          | Sieber ex DC.                            |
| <i>Eucalyptus strzeleckii</i>  | MaxEnt      | 0.871 ± 0.168<br>(0.997 ± 0.001) | 44555  | Strzelecki Gum         | (brookeriana617) | Rule                                     |
| <i>Eucalyptus tereticornis</i> | BRTs        | 0.994 ± 0.010                    | 30890  | Gippsland Red-gum      | 769              | Brooker & Slee                           |
| <i>Eucalyptus tricarpa</i>     | BRTs        | 0.969 ± 0.005                    | 76694  | Red Ironbark           | 8701791          | (L.A.S. Johnson) L.A.S Johnson & KD Hill |
| <i>Eucalyptus verrucata</i>    | Delineated  |                                  | 8      | Mt Abrupt Stringybark  | 715              | Ladiges & Whiffin                        |

|                              |            |               |        |                            |            |                              |
|------------------------------|------------|---------------|--------|----------------------------|------------|------------------------------|
| <i>Eucalyptus victoriana</i> | Delineated |               | 65     | Victoria Range Stringybark | 712        | Ladiges & Whiffin            |
| <i>Eucalyptus viminalis</i>  | BRTs       | 0.881 ± 0.006 | 340258 | Manna Gum                  | 615        | Labill.                      |
| <i>Eucalyptus viridis</i>    | BRTs       | 0.993 ± 0.007 | 19847  | Green Mallee               | 767        | R.T. Baker                   |
| <i>Eucalyptus willisii</i>   | BRTs       | 0.974 ± 0.011 | 32636  | Promontory Peppermint      | CANB468525 | Ladiges, Humphries & Brooker |
| <i>Eucalyptus yarraensis</i> | MaxEnt     | 0.887 ± 0.092 | 161050 | Yarra Gum                  | 8005851    | Maiden & Cambage             |

#### References:

Nicolle, D. 2006. Eucalypts of Victoria and Tasmania. Blooming Books, Melbourne, Australia

EUCLID software Version 3. 2006. Centre for Plant Biodiversity Research. Australian National Herbarium, Canberra, Australia

## Appendix S2: Supplemental Methods

### Species Distribution Modelling:

Species distributions were modeled using MaxEnt, Boosted Regression Trees (BRTs) or by manually outlining populations of rare species. The decision about which technique to use depended on the spatial extent of the species and available data.

Variables for SDMs included climate variables, edaphic variables, landscape variables, and one variable representing condition of native vegetation (Table S2). Climate variables (summer rainfall and minimum temperature) tended to be the most important across all models (Fig. S2). However, all variables were important in some models. For example, the vertical distance above wetlands was the most important variable in the model for River Red Gum (*E. camaldulensis*). The rare species *E. cadens* (listed as vulnerable federally and within the state) is best described by soil radiometric K (Cook *et al.* 1996), which indicates higher clay content in the soil.

Cross-validated AUC values averaged across species were 0.96 (ranging from 0.85 to 0.99) for BRTs and 0.98 (from 0.97 to 1.0) for MaxEnt models. The spatial overlap and model fit was evaluated using both types of modelling for select species. Model fits were similar between models (within AUC of 0.05) except for rare species that had very few points within the plots dataset used in the BRT modelling. In those cases, AUC values were higher for the MaxEnt models (Cross-validated values for both BRTs and MaxEnt in Appendix S1). Perhaps more importantly, the MaxEnt models also captured more known populations at the edge of the ranges of rare species, because they included occurrence records in addition to the plots datasets.

Range-restricted species were masked (see text) after the species distribution modelling. We delineated the known extent of the species by manually outlining point locations in ArcMap 10.2 and consulting species descriptions when necessary. In addition to the outline of the extent of the population, we also delineated polygons with the distribution that we were more or less certain of species occurrence and assigned probabilities based on expert opinion. In the case of *E. victoriana* and *E. verrucata*, many populations are visible in aerial photography and most were also confirmed on the ground. We converted the polygons to a grid in ArcMap 10.2 that matched the SDM layers.

We then assigned all values from the SDM outputs that fell outside the delineated distributions to zero using the Spatial Analyst toolset in ArcMap 10.2. All final SDM outputs were rounded to four decimal places (0.0001 being the lowest probability allowed) using the Raster package in R. Then, the grid cells were multiplied by four (to reduce file size) and wrote to an ascii file.

**Table S2. List and description of spatial data used in species distribution models (SDMs) and categories for spatial prioritization.**

| <b>Modelling variables</b>  | <b>Description</b>                                                                                                                                                                                                                                                                                                                                               |
|-----------------------------|------------------------------------------------------------------------------------------------------------------------------------------------------------------------------------------------------------------------------------------------------------------------------------------------------------------------------------------------------------------|
| Wetness Index               | Topographic Wetness Index a compound terrain attribute (sensu Bevan and Kirby 1979) implemented using the Shuttle Radar Topography Mission (SRTM) Digital Elevation Model and TOPOCROP Version 2.1 (Schmidt 2002)                                                                                                                                                |
| Potassium                   | Radiometric Data – Radioelement count of Potassium. Sourced from Various Federal and State Agencies.                                                                                                                                                                                                                                                             |
| Thorium                     | Radiometric Data – Radioelement count of Thorium. Sourced from various Federal and State Agencies.                                                                                                                                                                                                                                                               |
| Summer Max Temp             | Mean maximum temperature January developed with ANUCLIM (Houlder et al 2000) applied to 30 m Shuttle Radar Topography Mission (SRTM) Digital Elevation Model.                                                                                                                                                                                                    |
| Winter Min Temp             | Mean minimum temperature July developed with ANUCLIM (Houlder et al 2000) applied to 30 m Shuttle Radar Topography Mission (SRTM) Digital Elevation Model.                                                                                                                                                                                                       |
| Summer Rainfall             | Mean Rainfall in January developed with ANUCLIM (Houlder et al 2000) applied to 30 m Shuttle Radar Topography Mission (SRTM) Digital Elevation Model.                                                                                                                                                                                                            |
| Winter Rainfall             | Mean Rainfall July developed with ANUCLIM (Houlder et al 2000) applied to 30 m Shuttle Radar Topography Mission (SRTM) Digital Elevation Model.                                                                                                                                                                                                                  |
| Distance above wetlands     | Log transformed vertical distance above mapped water features - wetlands and waterbodies (Conrad 2002). Implemented on 30 m Shuttle Radar Topography Mission (SRTM) Digital Elevation Model.                                                                                                                                                                     |
| Dist. above major streams   | Log transformed vertical distance major rivers (Conrad 2002). Implemented on 30 m Shuttle Radar Topography Mission (SRTM) Digital Elevation Model.                                                                                                                                                                                                               |
| Annual Insolation           | Relative potential incoming solar radiation (PISR). = PISR Winter solstice + PISR Summer solstice + PISR equinox (for methods see Boehner and Antoic 2009) Wetness Index a compound terrain attribute (sensu Bevan and Kirby 1979) implemented using the Shuttle Radar Topography Mission (SRTM) Digital Elevation Model and TOPOCROP Version 2.1 (Schmidt 2002) |
| Habitat Quality (Condition) | NVR2013_condV2                                                                                                                                                                                                                                                                                                                                                   |



| Mask Layers                             | Description                                                                                                                                                                                                                                            |
|-----------------------------------------|--------------------------------------------------------------------------------------------------------------------------------------------------------------------------------------------------------------------------------------------------------|
| Native woody vegetation cover           | Derived from NV2010_EXTENT_V2 from the Department of Environment and Primary Industries                                                                                                                                                                |
| Protected Areas                         | Derived from Public Land Management layer (PLM 25) updated 2013 from the Department of Environmental and Primary Industries. 1:25K polygons resampled to 75 m raster. Protected areas defined as any land-use type managed primarily for conservation. |
| National parks                          | Derived from 'Tourism Investment Opportunities in national parks Estate' from the Department of Environment and Primary Industries 2013                                                                                                                |
| National Park Tourism Development Zones | Derived from 'Tourism Investment Opportunities in national parks Estate' from the Department of Environment and Primary Industries 2013                                                                                                                |

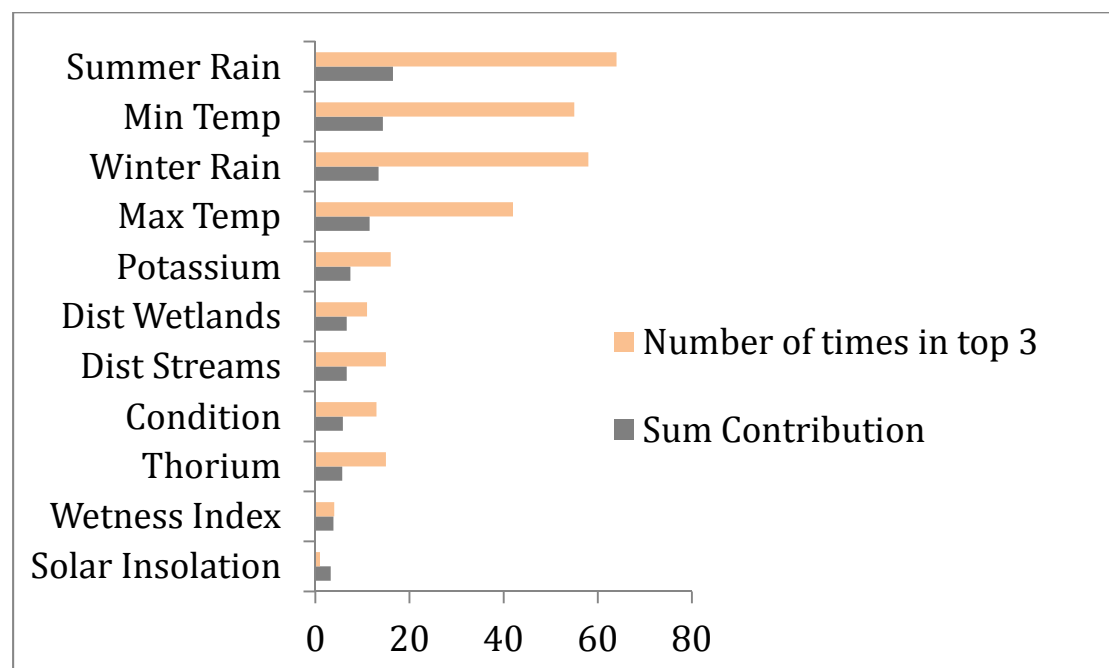

**Figure S2** The overall contribution of each predictor variable represented by: (1) the number of times that particular predictor was one of the top three predictors for each individual model, and (2) the summed contribution of each variable calculated as the relative contribution of each variable to each model multiplied by the explanatory power of the model (AUC), then summed across all species models.

## References

Beven, K.J., Kirkby, M.J. 1979. A physically-based variable contributing area model of basin hydrology' *Hydrology Science Bulletin* 24(1): 43-69.

Conrad, O. 2002. `ChannelNetwork_Altitude.cpp`, <http://sourceforge.net/saga-gis>: Accessed 24/05/2008.

Cook, S., Corner, R., Groves, P. & Grealish, G. 1996. Use of airborne gamma radiometric data for soil mapping. *Australian Journal of Soil Research* 34, 183-194.

Houlder, D., Hutchinson, M., Nix, H. & MacMahon, J., 2001. ANUCLIM 5.1 Users Guide. The Australian National University, Center for Resource and Environmental Studies, Canberra.

Schmidt, F. and Persson, A. 2003. Comparison of DEM data capture and topographic wetness indices. *Precision Agriculture* 4:179-192.

**Appendix S3:** Eucalypt phylogeny with major taxonomic groups labeled: subgenera in black and sections within subg. *Symphyomyrtus* in grey. Posterior probabilities are labeled on nodes.

The *Corymbia* and *Angophora* clade is sister to genus *Eucalyptus*. Within the genus *Eucalyptus*, there are two subgenera in Victoria, subgenus *Eucalyptus* and subgenus *Symphyomyrtus*. Within subg. *Symphyomyrtus*, section *Maidenaria* and *Exsertaria* form a group, sections *Adnataria*, *Dumaria*, and part of *Bisectae* form a group, and the remainder of *Bisectae* forms a separate distinct group [1,2]. Subgenus *Eucalyptus* is less well resolved into section-level taxonomic categories [3]. Morphological data help differentiate some subg. *Eucalyptus* groups unresolved in ITS and ETS molecular phylogenies [4], but morphological data are not available for all species considered here.

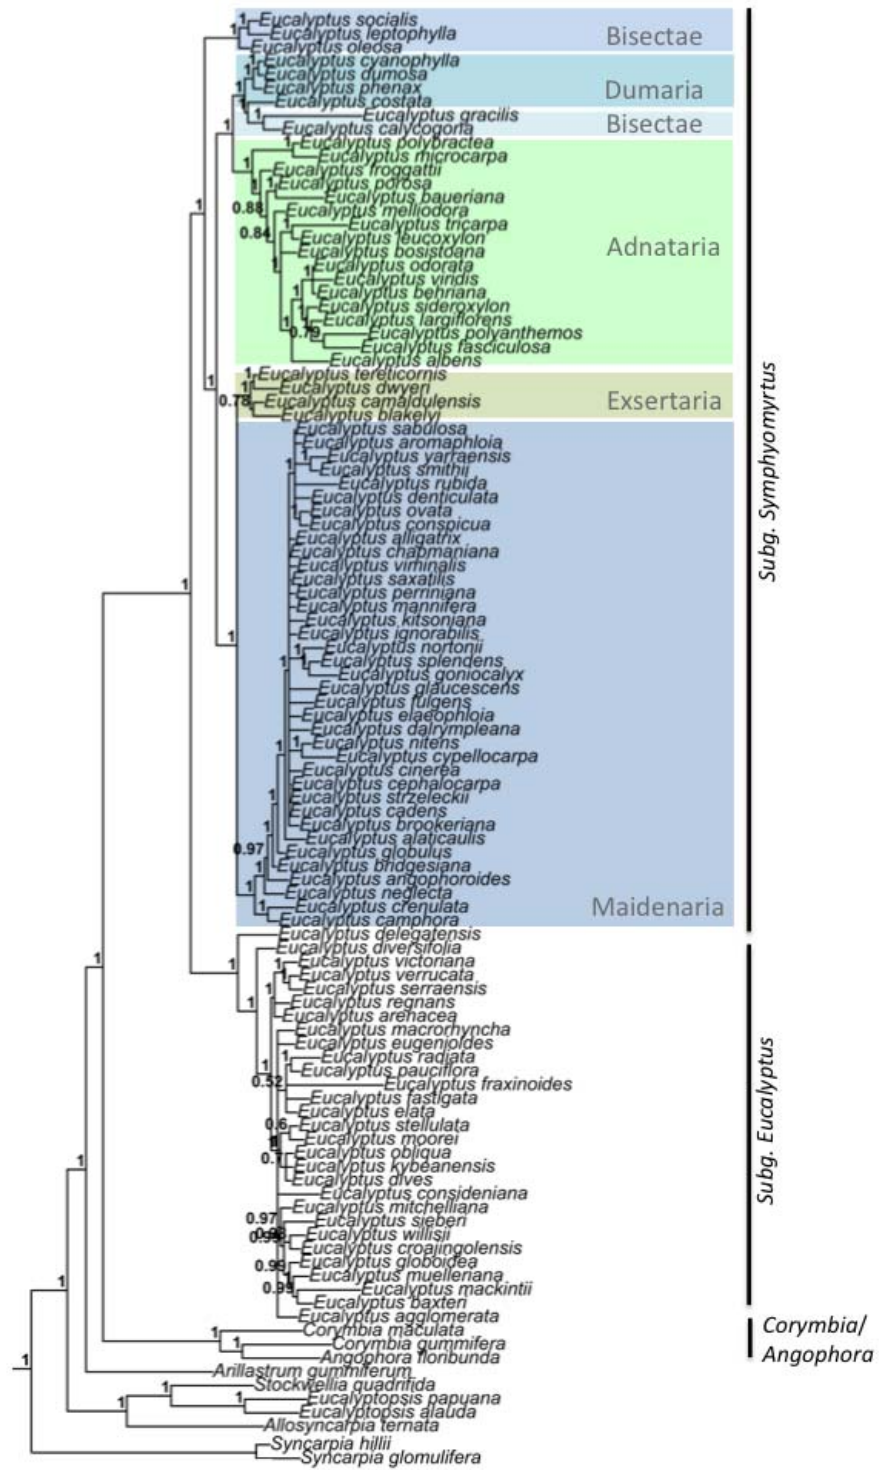

## References

- [1] McKinnon, G.E., Vaillancourt, R.E., Steane, D. & Potts, B.M. 2008 An AFLP marker approach to lower-level systematics in *Eucalyptus* (Myrtaceae). *American Journal of Botany* **95**, 368-380.
- [2] Steane, D., Nicolle, D., McKinnon, G.E., Vaillancourt, R.E. & Potts, B.M. 2002 Higher-level relationships among the eucalypts are resolved by ITS-sequence data. *Aust. Syst. Bot.* **15**, 49-62.
- [3] Brooker, M.I.H. 2000 A new classification of the genus *Eucalyptus* L'Hér. (Myrtaceae). *Aust. Syst. Bot.* **13**, 79-148.
- [4] Ladiges, P.Y., Bayly, M.J. & Nelson, G.J. 2010 East-West Continental Vicariance in *Eucalyptus* Subgenus *Eucalyptus*. In *Beyond Cladistics: The Branching of a Paradigm* (eds. D.M. Williams & S. Knapp), pp. 267-302. Berkeley, University of California Press.

**Appendix S4 Map of hypothetical expansion of the current protected area system** by 5 percent (as in Fig. 3a) and 20 percent of their current area in blue. Expansion zones represent areas that best add to the PD that is already protected. A subset of this map is Figure 3b in the text.

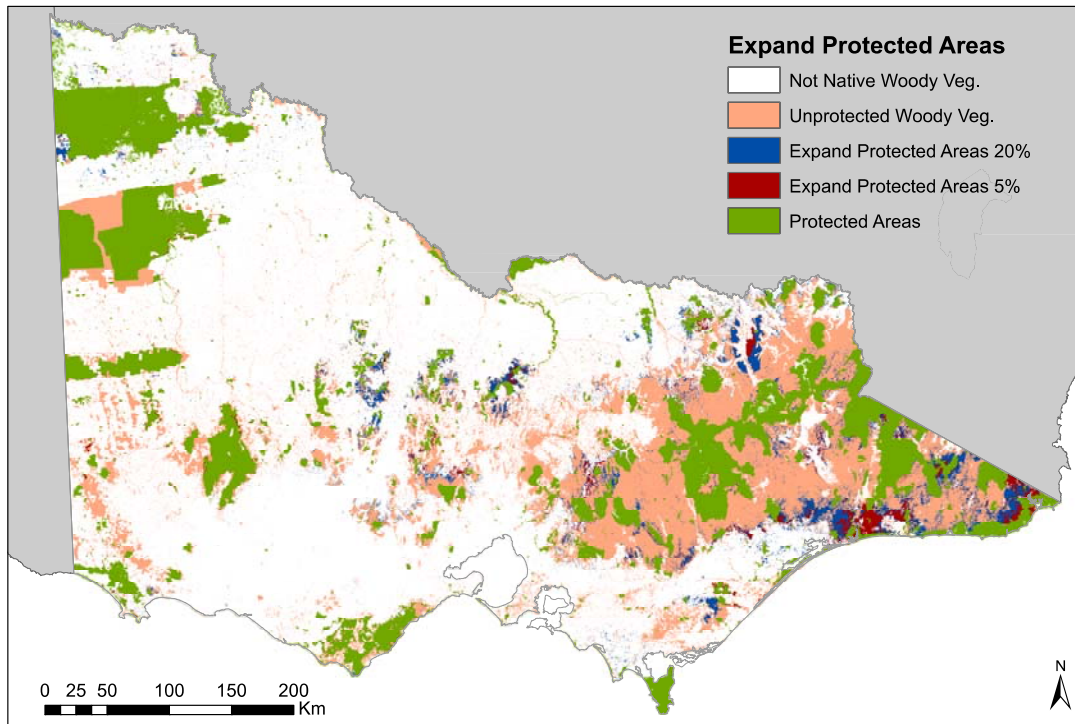

**Appendix S5: Tourism Development in national parks Scenario for Victoria, Australia.** The top 10 percent of tourism development zones ranked by PD contribution are shown as red. These development zones could be transferred to protected zones to capture 72% more PD than currently is found in protected zones.

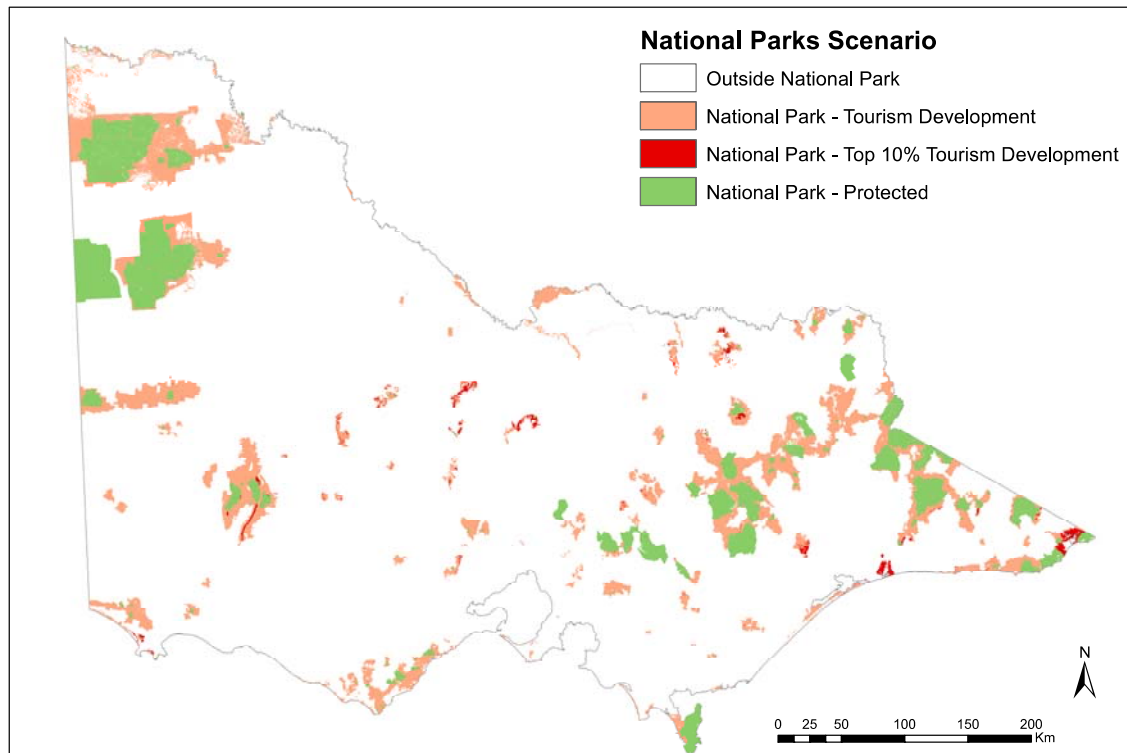

Supplement: rstb20140007supp.pdf [file rstb20140007supp.pdf]
